# Supplementary material for: SRC-3 protects intestine from DSS-induced colitis by inhibiting inflammation and promoting goblet cell differentiation through enhancement of KLF4 expression
Source: PubMed Central journal article supplement — Int J Biol Sci. 2018 Nov 3;14(14):2051–64. doi: 10.7150/ijbs.28576 (PMC6299374; doi:10.7150/ijbs.28576), 2018-11-03
Supplement: ijbsv14p2051s1.pdf [file ijbsv14p2051s1.pdf]

# Supplementary Figure 1

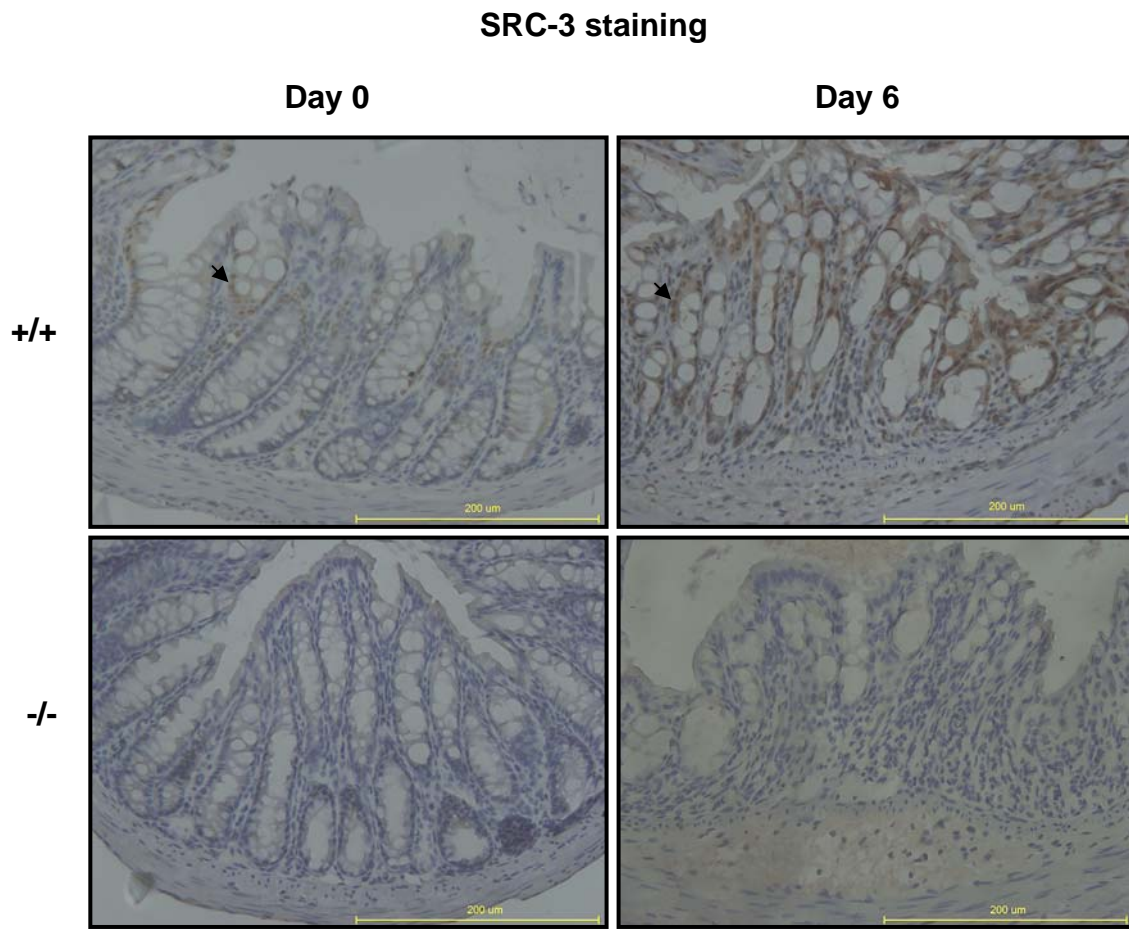

**Supplementary Figure 1. SRC-3 expression is detected in the colonic goblet cell of wild-type mouse by immunohistochemistry.** 400 × pictures are representative of three separate experiments, n=3 per group. Arrows indicate SRC-3 immuno-positive signals.

## Supplementary Figure 2

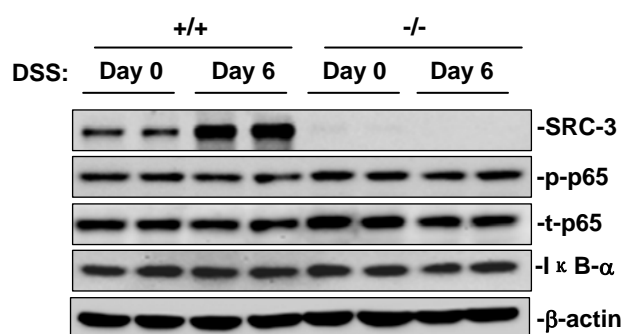

**Supplementary Figure 2. Deletion of SRC-3 does not repress NF-κB pathway inflammatory response in mouse intestinal epithelium.** The expression of p-p65 and IκBα was comparable in colonic epithelial cells of wild-type and SRC-3<sup>-/-</sup> mice without or with DSS administration.
